1 **Variant SARS-CoV-2 mRNA vaccines confer broad neutralization as primary or booster**  
2 **series in mice**

3 **Authors:** Kai Wu,<sup>at\*</sup> Angela Choi,<sup>at</sup> Matthew Koch,<sup>at</sup> Sayda Elbashir,<sup>at</sup> LingZhi Ma,<sup>a</sup> Diana Lee,<sup>a</sup>  
4 Angela Woods,<sup>a</sup> Carole Henry,<sup>a</sup> Charis Palandjian,<sup>a</sup> Anna Hill,<sup>a</sup> Hardik Jani,<sup>a</sup> Julian Quinones,<sup>a</sup>  
5 Naveen Nunna,<sup>a</sup> Sarah O’Connell,<sup>b</sup> Adrian B McDermott,<sup>b</sup> Samantha Falcone,<sup>a</sup> Elisabeth  
6 Narayanan,<sup>a</sup> Tonya Colpitts,<sup>a</sup> Hamilton Bennett,<sup>a</sup> Kizzmekia S Corbett,<sup>b</sup> Robert Seder,<sup>b</sup> Barney S  
7 Graham,<sup>b</sup> Guillaume BE Stewart-Jones,<sup>a</sup> Andrea Carfi,<sup>a</sup> Darin K Edwards<sup>at\*</sup>

8

9 **Affiliations:** <sup>a</sup>Moderna Inc., 200 Technology Square, Cambridge, Massachusetts, 02139, USA;  
10 <sup>b</sup>Vaccine Research Center, National Institute of Allergy and Infectious Diseases, National  
11 Institutes of Health, 10 Center Dr, Bethesda, Maryland, 20814, USA.

12 <sup>†</sup>Contributed equally to the manuscript.

13 <sup>\*</sup>Corresponding authors: KW (kai.wu@modernatx.com) Moderna Inc. 200 Technology Square  
14 Cambridge, Massachusetts, 02139, USA or DKE (darin.edwards@modernatx.com) Moderna Inc.  
15 200 Technology Square Cambridge, Massachusetts, 02139, USA.

16 **Abbreviations:**

17 ACE2, angiotensin converting enzyme 2; ELISA, enzyme-linked immunosorbent assay; GMT,  
18 geometric mean titer; ID50, inhibitory dilution factor; IgG, immunoglobulin G; LNP, lipid  
19 nanoparticle; Nab, neutralizing antibody; NHPs, non-human primates; ns, not significant; NTD,  
20 N-terminal domain; PBS, phosphate-buffered saline; PsVN, pseudovirus neutralization titer;  
21 RBD, receptor binding domain; RLUs, relative luminescence units; S, spike; SARS-CoV-2,  
22 severe acute respiratory syndrome coronavirus 2; TMB, tetramethylbenzidine; UTR, untranslated  
23 region; VOC, variant of concern; VOI, variant of interest; VSV, vesicular stomatitis virus.

24 **Abstract**

25 Severe acute respiratory syndrome coronavirus 2 (SARS-CoV-2) is the causative agent of a global  
26 pandemic. Safe and effective COVID-19 vaccines are now available, including mRNA-1273,  
27 which has shown 94% efficacy in prevention of symptomatic COVID-19 disease. However, the  
28 emergence of SARS-CoV-2 variants has led to concerns of viral escape from vaccine-induced  
29 immunity. Several variants have shown decreased susceptibility to neutralization by vaccine-  
30 induced immunity, most notably B.1.351 (Beta), although the overall impact on vaccine efficacy  
31 remains to be determined. Here, we present the initial evaluation in mice of 2 updated mRNA  
32 vaccines designed to target SARS-CoV-2 variants: (1) monovalent mRNA-1273.351 encodes for  
33 the spike protein found in B.1.351 and (2) mRNA-1273.211 comprising a 1:1 mix of mRNA-1273  
34 and mRNA-1273.351. Both vaccines were evaluated as a 2-dose primary series in mice; mRNA-  
35 1273.351 was also evaluated as a booster dose in animals previously vaccinated with mRNA-1273.  
36 The results demonstrated that a primary vaccination series of mRNA-1273.351 was effective at  
37 increasing neutralizing antibody titers against B.1.351, while mRNA-1273.211 was effective at  
38 providing broad cross-variant neutralization. A third (booster) dose of mRNA-1273.351  
39 significantly increased both wild-type and B.1.351-specific neutralization titers. Both mRNA-  
40 1273.351 and mRNA-1273.211 are being evaluated in pre-clinical challenge and clinical studies.

41 **Keywords:** COVID-19, SARS-CoV-2 variants of concern, mRNA-1273, primary series, booster  
42 dose, neutralization

43

## 44 **1. Introduction**

45 Since the declaration of a global pandemic by the World Health Organization on March 11,  
46 2020, infection with the severe acute respiratory syndrome coronavirus 2 (SARS-CoV-2) has led  
47 to approximately 4.7 million deaths worldwide [1, 2]. Shortly after the SARS-CoV-2 genetic  
48 sequence was determined, mRNA-1273—a novel lipid nanoparticle (LNP) encapsulated  
49 messenger RNA-based vaccine encoding for a prefusion-stabilized, full-length spike (S)  
50 glycoprotein of the Wuhan-Hu-1 isolate of SARS-CoV-2—was developed [3, 4]. Vaccination with  
51 two 100 µg doses of mRNA-1273 four weeks apart was 94% efficacious against symptomatic  
52 COVID-19 disease; mRNA-1273 was granted Emergency Use Authorization by the Food and  
53 Drug Administration in December 2020 [5, 6].

54 The emergence of SARS-CoV-2 variants with substitutions in the receptor binding domain  
55 (RBD) and N-terminal domain (NTD) of the viral S protein has raised concerns among scientists  
56 and health officials [7-10]. The entry of coronaviruses into host cells is mediated by interaction  
57 between the RBD of the viral S protein and the host receptor, angiotensin-converting enzyme 2  
58 (ACE2) [3, 11-14]. Several studies have shown that the RBD is the main target of neutralizing  
59 antibodies against SARS-CoV-2 [4, 15-17]. A neutralization “supersite” has also been identified  
60 in the NTD [18]. A decrease in vaccine-mediated viral neutralization has been correlated with  
61 amino acid substitutions in the RBD (eg, K417T/N, E484K, and N501Y) and NTD (eg, L18F,  
62 D80A, D215G, and  $\Delta$ 242-244) of the S protein. Some of the most recently circulating variants of  
63 concern (VOCs) and variants of interest (VOIs) with key mutations in the RBD and NTD—  
64 including B.1.1.7 (Alpha), B.1.351 (Beta), P.1 (Gamma), B.1.526 (Iota), and B.1.427/B.1.429  
65 (Epsilon or CAL.20C) lineages—have shown reduced susceptibility to neutralization from  
66 convalescent serum and resistance to monoclonal antibodies [18-25]. Note that mutations in the

67 NTD domain, specifically the neutralization supersite, are extensive in the B.1.351 lineage virus  
68 [18].

69 Using 2 orthogonal pseudovirus neutralization (PsVN) assays based on vesicular stomatitis  
70 virus (VSV) and lentivirus expressing S variants, neutralizing capacity of sera from phase 1  
71 participants and non-human primates (NHPs) that received 2 doses of mRNA-1273 was reported  
72 [26]. No significant impact on neutralization against the B.1.1.7 variant was observed. However,  
73 reduced neutralization was measured against the B.1.351 variant, and to a lesser extent, in the P.1  
74 B.1.427/B.1.429 and B.1.1.7+E484K variants [26]. Clinical studies in South Africa demonstrated  
75 reduced efficacy against symptomatic COVID-19 disease for the NVX-CoV2373 (Novavax),  
76 AZD1222 (University of Oxford/AstraZeneca), and Ad26.COV2.S (Janssen/Johnson & Johnson)  
77 vaccines [27-30]. Pfizer/BioNTech has recently reported high efficacy of the mRNA BNT162b2  
78 vaccine against B.1.351 among a small number of recipients from South Africa in the phase 2–3  
79 portion of a global phase 1–2–3 trial; however, a report from Israel suggests increased  
80 breakthrough infection rates by B.1.351 in BNT162b2 vaccinated individuals at 7–14 days after  
81 the second dose [31, 32]. Studies have demonstrated reduced neutralization titers against the full  
82 B.1.351 variant following mRNA-1273 vaccination, although levels are still significant and  
83 expected to be protective based on challenge studies in NHPs [26, 33, 34]. Despite this prediction  
84 of continued efficacy of mRNA-1273 against this key variant of concern (VOC), the magnitude  
85 and duration of vaccine-mediated protection is still unknown. Moreover, a key related question is  
86 whether development of new mRNA vaccines to match the B.1.351 variant will enable enhanced  
87 neutralization responses and durability.

88 Herein, we present the design and pre-clinical evaluation of updated mRNA-1273 vaccines  
89 against SARS-CoV-2 variants, which include monovalent mRNA-1273.351 and a multivalent

90 mRNA-1273.211. Like mRNA-1273, mRNA-1273.351 encodes the prefusion stabilized S protein  
91 of SARS-CoV-2; however, in contrast to mRNA-1273, mRNA-1273.351 incorporates key  
92 mutations present in the B.1.351 variant, including L18F, D80A, D215G,  $\Delta$ 242-244, R246I,  
93 K417N, E484K, N501Y, D614G, and A701V (Fig. 1). To expand the breadth of coverage to  
94 multiple circulating variants as well as the ancestral wild-type virus that is still circulating globally,  
95 mRNA-1273.211 is a 1:1 mix of mRNA-1273 and mRNA-1273.351. Two initial studies were  
96 performed in BALB/c mice to evaluate the immunogenicity of mRNA-1273.351 or mRNA-  
97 1273.211 as a primary series and/or as a booster. The first study assessed the immunogenicity of  
98 a primary series (day 0, 21) of mRNA-1273.351 or mRNA-1273.211 versus mRNA-1273. A  
99 second study evaluated the immunogenicity of a third (booster) dose of mRNA-1273.351 213 days  
100 after mice were vaccinated with a primary series of mRNA-1273, and immunogenicity was  
101 assessed before and after the booster dose.

## 102 **2. Methods**

### 103 ***2.1 Data reporting***

104 No statistical methods were used to predetermine sample size. The experiments were not  
105 randomized and the investigators were not blinded to allocation during experiments and outcome  
106 assessment.

### 107 ***2.2 Pre-clinical vaccine mRNA and LNP production process***

108 A sequence-optimized mRNA encoding prefusion-stabilized Wuhan-Hu-1 or B.1.351-variant  
109 SARS-CoV-2 S-2P protein was synthesized in vitro using an optimized T7 RNA polymerase-  
110 mediated transcription reaction with complete replacement of uridine by N1m-pseudouridine [35].  
111 The reaction included a DNA template containing the immunogen open-reading frame flanked by  
112 5' untranslated region (UTR) and 3' UTR sequences and was terminated by an encoded polyA tail.  
113 After transcription, the cap-1 structure was added to the 5' end using the *Vaccinia* capping enzyme  
114 (New England Biolabs) and *Vaccinia* 2'-O-methyltransferase (New England Biolabs). The mRNA  
115 was purified by oligo-dT affinity purification, buffer exchanged by tangential flow filtration into  
116 sodium acetate, pH 5.0, sterile filtered, and kept frozen at  $-20^{\circ}\text{C}$  until further use.

117 The mRNA was encapsulated in an LNP through a modified ethanol-drop nanoprecipitation  
118 process described previously [36]. Ionizable, structural, helper, and polyethylene glycol lipids  
119 were briefly mixed with mRNA in an acetate buffer, pH 5.0, at a ratio of 2.5:1 (lipids:mRNA).  
120 The mixture was neutralized with Tris-HCl, pH 7.5, sucrose was added as a cryoprotectant, and  
121 the final solution was sterile-filtered. Vials were filled with formulated LNP and stored frozen at  
122  $-70^{\circ}\text{C}$  until further use. The drug product underwent analytical characterization—which included  
123 the determination of particle size and polydispersity, encapsulation, mRNA purity, double-

124 stranded RNA content, osmolality, pH, endotoxin, and bioburden—and the material was deemed  
125 acceptable for in vivo study.

### 126 ***2.3 Mouse model***

127 Animal experiments were carried out in compliance with approval from the Animal Care and  
128 Use Committee of Moderna Inc. Female BALB/c mice (6 to 8 weeks old; Charles River  
129 Laboratories) were used. mRNA formulations were diluted in 50  $\mu$ L of 1X phosphate-buffered  
130 saline (PBS), and mice were inoculated via intramuscular injection into the same hind leg for both  
131 prime, boost, and third dose. Control mice received PBS because prior studies have demonstrated  
132 that tested mRNA formulations do not create significant levels of non-specific immunity beyond  
133 a few days [37-39]. Sample size for animal experiments was determined on the basis of criteria set  
134 by the institutional Animal Care and Use Committee. Experiments were neither randomized nor  
135 blinded.

### 136 ***2.4 Enzyme-linked Immunosorbent Assay (ELISA)***

137 Microtiter plates (96-well; Thermo) were coated with 1  $\mu$ g/mL S-2P protein (Genscript)  
138 corresponding to the S protein of the Wuhan-Hu-1 virus. After overnight incubation at 4°C, plates  
139 were washed four times with PBS/0.05% Tween-20 and blocked for 1.5 hours at 37°C  
140 (SuperBlock-Thermo). After washing, five-fold serial dilutions of mouse serum were added (assay  
141 diluent: 0.05% Tween-20 and 5% goat serum in PBS). Plates were incubated for 2 hours at 37°C,  
142 washed and horseradish peroxidase-conjugated goat anti-mouse immunoglobulin G (IgG)  
143 (Southern Biotech) was added at a 1:20,000 dilution (S-2P) in assay diluent. Plates were incubated  
144 for 1 hour at 37°C, washed, and bound antibody was detected with a 3,3',5,5'-tetramethylbenzidine  
145 (TMB) substrate (SeraCare). After incubation for 10 minutes at room temperature, the reaction  
146 was stopped by adding a TMB stop solution (SeraCare) and the absorbance was measured at 450



147 nm. Titers were determined using a four-parameter logistic curve fit in Prism v.8 (GraphPad  
148 Software, Inc.) and defined as the reciprocal dilution at approximately optical density<sub>450</sub> = 1.0  
149 (normalized to a mouse standard on each plate).

### 150 ***2.5 Recombinant VSV-based PsVN assay***

151 Codon-optimized full-length S protein of the original Wuhan-Hu-1 variant with D614G  
152 mutation (D614G) or the indicated S variants, listed in Table 1, were cloned into a pCAGGS vector.  
153 To make SARS-CoV-2 full-length S pseudotyped recombinant VSV-ΔG-firefly luciferase virus,  
154 BHK-21/WI-2 cells (Kerafast) were transfected with the S expression plasmid and subsequently  
155 infected with VSVΔG-firefly-luciferase as previously described [40]. For a neutralization assay,  
156 serially diluted serum samples were mixed with pseudovirus and incubated at 37°C for 45 minutes.  
157 The virus-serum mix was subsequently used to infect A549-hACE2-TMPRSS2 cells [41] for 18  
158 hours at 37°C before adding ONE-Glo reagent (Promega) for measurement of the luciferase signal  
159 by relative luminescence units (RLUs). The percentage of neutralization was calculated based on  
160 the RLUs of the virus-only control, and subsequently analyzed using four-parameter logistic curve  
161 (Prism v.8).

### 162 ***2.6 Statistical Analysis.***

163 Animal studies were completed once with all in vitro testing completed in duplicate or  
164 triplicate with 1 replicate, unless otherwise stated. Two-sided Wilcoxon matched-pairs signed rank  
165 test was used to compare the same animals against different viruses or at different time points.  
166 Statistical analyses were performed (Prism v.8). Geometric mean titers with 95% CIs and lower  
167 limits of detection are included, where applicable.

168

169

### 170 **3. Results**

#### 171 *3.1 mRNA-1273.351 and mRNA-1273.211 were immunogenic as a primary vaccination* 172 *series in mice*

173 The immunogenicity of mRNA-1273.351 and mRNA-1273.211 vaccines against the original  
174 Wuhan-Hu-1 variant with the D614G mutation (referred to as wild-type) and the B.1.351 variant  
175 was evaluated in BALB/c mice 2 weeks after the first and second injection (Fig. 1). Animals were  
176 vaccinated with 1 or 10 µg of mRNA-1273, mRNA-1273.351, or mRNA-1273.211 on a 0, 21-day  
177 schedule (Fig. 2a). S protein-binding antibody titers were assessed using a Wuhan-Hu-1 S-2P  
178 ELISA. In addition, neutralizing antibody titers were assessed in a VSV-based PsVN assay against  
179 wild-type and variant viruses (Table 1).

180 High levels of binding antibody were elicited by vaccination in all animals 2 weeks after the  
181 first and second injection, with 4.5 to 9.4-fold increased S-2P binding titers measured after the  
182 second dose (Fig. 2b). Slightly lower antibody levels were observed for mRNA-1273.351  
183 compared with mRNA-1273, potentially due to the coating S-2P protein used in the ELISA being  
184 homologous to mRNA-1273. These results demonstrate that both mRNA-1273.351 and mRNA-  
185 1273.211 are immunogenic in mice. mRNA-1273 elicited higher neutralization titers against the  
186 D614G than B.1.351 pseudovirus (Fig. 2c,d), although the approximate 2-fold difference was  
187 smaller than previously measured with phase 1 clinical trial sera [26]. mRNA-1273.351 elicited  
188 higher neutralization titers against B.1.351 compared with the D614G pseudovirus (Fig. 2c,d),  
189 with an approximate 4-fold difference in measured titers. When mRNA-1273.211 was used to  
190 vaccinate mice, similar neutralization titers were elicited against both the D614G and B.1.351  
191 pseudoviruses (Fig. 2c,d), with no significant difference in neutralization titers. Thus, vaccination

192 of mice with mRNA-1273.351 elicited high levels of neutralizing antibody against the B.1.351  
193 pseudovirus and comparably lower levels versus D614G, whereas the multivalent mRNA-  
194 1273.211 vaccine stimulated robust neutralization responses against both D614G and B.1.351  
195 pseudoviruses.

196 Sera from mice collected 2 weeks after the second injection was also assessed against SARS-  
197 CoV-2 variants that emerged in Brazil (P.1) and California (B.1.427/B.1.429 or CAL.20C). As  
198 described in Table 1, some of the mutations in these variants were different from both the Wuhan-  
199 Hu-1 and B.1.351 lineages, although the RBD mutations (K417T/N, E484K, N501Y) are common  
200 to both the P.1 and B.1.351 viruses. As observed in previous assessments of NHPs and clinical trial  
201 sera [26], mice vaccinated with mRNA-1273 showed an approximate 2-fold reduction in  
202 neutralizing antibody levels against both the CAL.20C and P.1 variants (Fig. 2e). These reductions  
203 in neutralization titers against CAL.20C and P.1 variants were more pronounced in mice vaccinated  
204 with mRNA-1273.351 (3.7-fold and 2.6-fold reductions in geometric mean titers [GMTs] for  
205 mRNA-1273.351 compared with mRNA-1273, respectively). However, the multivalent mRNA-  
206 1273.211 vaccine neutralized these variants similarly to mRNA-1273.

207 ***3.2 mRNA-1273.351 was an effective third (booster) dose in animals previously vaccinated***  
208 ***with a primary vaccination series of mRNA-1273***

209 To evaluate the ability of the mRNA-1273.351 to boost pre-existing immunity and increase  
210 neutralization against both the wild-type and the B.1.351 virus, BALB/c mice were immunized  
211 with 1 or 0.1  $\mu$ g mRNA-1273 on day 1 and 22, and the level and durability of the antibody  
212 responses were evaluated over the course of 7 months. Sera collection occurred on day 212, and a  
213 third dose of 1 or 0.1  $\mu$ g mRNA-1273.351 was administered on day 213 (Fig. 3a).

214 High levels of binding antibody were elicited by vaccination with mRNA-1273, with peak  
215 titers measured 2 weeks after the second dose (Fig. 3b). After an initial drop in antibody levels,  
216 titers were stable over the 7-month monitoring period. Following the mRNA-1273.351 booster  
217 injection, antibody levels dramatically rose, exceeding the previously measured peak for both the  
218 1 and 0.1  $\mu\text{g}$  dose levels.

219 Neutralization titers were measured in the D614G PsVN assay on day 36 and 212, 1 day prior  
220 to the third dose. Titters remained high, with an  $\sim$ 1.5-fold drop measured over that period. Note  
221 that neutralizing titers at day 212 were measured in both the D614G and B.1.351 PsVN assays  
222 (Fig. 3c-e), with 6.6-fold higher titers measured in the D614G PsVN assay; this difference is  
223 similar to neutralization reductions observed with sera of NHPs and humans who received 2 doses  
224 of mRNA-1273 and increases the potential correlation of this animal model to what may be  
225 observed in humans.

226 The third dose of mRNA-1273.351 increased neutralization titers 4.5- and 15-fold in the  
227 D614G and B.1.351 PsVN assays, respectively (Fig. 3c,d). The difference between the 2 assays  
228 narrowed to 2-fold following the booster dose (Fig. 3c,e); the GMT of 15,524 against B.1.351 was  
229  $\sim$ 1.5 fold higher than the peak titer against D614G 2 weeks after the second dose (Fig. 3c). Animals  
230 vaccinated at the 0.1  $\mu\text{g}$  dose level had lower titers, but similar trends for binding antibody and  
231 neutralization titers were observed (data not shown).

#### 232 4. Discussion

233 In this study, mRNA-1273.351 and mRNA-1273.211 were evaluated in mice as both a primary  
234 vaccination series and as a third booster dose in animals previously vaccinated with 2 injections  
235 of mRNA-1273. As a primary vaccination series, both vaccines were potently immunogenic after  
236 the first injection, with both S-2P binding and neutralizing antibody titers significantly increasing  
237 after the second injection. Neutralizing activity of mRNA-1273.351 against the D614G variant  
238 was 4-fold lower than that against the B.1.351 variant and 6.3-fold lower against D614G variant  
239 compared to mRNA-1273. In contrast, the multivalent mRNA-1273.211 vaccine elicited robust  
240 and comparable neutralizing titers against both D614G and B.1.351, which closely match those  
241 observed against D614G after mRNA-1273 vaccination. Thus, as a primary vaccination series, a  
242 multivalent approach appears most effective in broadening immune responses—as neutralization  
243 potency was enhanced against both B.1.351 and P.1 versus mRNA-1273 and remained significant  
244 against B.1.427/B.1.429/CAL.20C.

245 mRNA-1273.351 was evaluated as a booster injection in mice vaccinated with mRNA-1273  
246 approximately 7 months previously. The third dose of mRNA-1273.351 dramatically boosted both  
247 S-2P binding antibody titers (Fig. 3a,b) and D614G and B.1.351 PsV neutralization titers (Fig. 3c-  
248 e). Neutralizing titers against B.1.351 PsV increased to levels well above the peak neutralizing  
249 titer against D614G after the second dose of mRNA-1273, the latter of which was fully protective  
250 in mice challenged with the mouse-adapted USA-WA1-F6/2020 variant [41]. In addition, the  
251 booster dose also increased neutralizing titers against D614G, although the fold-increase was less  
252 than that against B.1.351, as expected. Overall, the third injection of mRNA-1273.351  
253 dramatically increased both D614G and B.1.351 neutralization titers, with titers much higher than  
254 the day 36 peak. Further, the difference in titers measured in the D614G and B.1.351 PsVN assays

255 decreased from a 6.6-fold difference prior to the boosting dose, to a 2-fold difference 2 weeks after  
256 the third dose.

257 The number of animals available for boosting in this study allowed evaluation of only 1  
258 boosting scenario (ie, mRNA-1273.351). Ongoing studies will evaluate the ability of mRNA-1273,  
259 mRNA-1273.351, and mRNA-1273.211 to effectively boost immunity driven by a primary  
260 vaccination series of mRNA-1273. Studies will also evaluate mRNA-1273.351 and mRNA-  
261 1273.211 in additional primary vaccination and boosting studies in mice, golden Syrian hamsters,  
262 and rhesus macaques, with either Wuhan-Hu-1 or B.1.351 challenge planned. These studies are  
263 designed to assess the level of neutralization of sera derived from vaccinated animals against  
264 pseudoviruses with either the Wuhan-Hu-1 D614G or the B.1.351 S proteins and the level of  
265 protection provided against Wuhan-Hu-1 and B.1.351 challenge. Global surveillance for the  
266 emergence of additional SARS-CoV-2 VOCs and the neutralization of VOCs by mRNA-1273  
267 vaccinee sera are also ongoing. If additional variants emerge that reduce the neutralization capacity  
268 of mRNA-1273 further, additional mRNA vaccine designs may be developed and evaluated. In  
269 this study, the multivalent mRNA-1273.211 vaccine has already demonstrated to be an  
270 immunogenic strategy against multiple variants, and ongoing preclinical and clinical studies will  
271 provide further evidence of the utility of using a booster dose of mRNA-1273.211. This approach  
272 also supports seasonal adjustment, allowing for changes in response to the evolution of the SARS-  
273 CoV-2 virus.

274 Several potential limitations to the current study should be highlighted. Sera from mRNA-1273  
275 vaccinated NHP or human sera was shown to have 6-8 fold reduced neutralizing activity against  
276 the B.1.351 variant SARS-CoV-2 in several assessments, although the level of neutralization  
277 remained at levels that are predicted to be protective [26]. Results in this study, however, showed

278 that after the primary series of mRNA-1273, only a 2-fold reduced neutralization against the  
279 B.1.351 virus was evident 2 weeks after the second dose. A 6.6-fold reduction was seen at day 212,  
280 more relevant to what has been measured from human sera. Further studies in animal species more  
281 predictive of responses in humans such as NHPs as well as clinical studies in humans are ongoing.  
282 Further, only mRNA-1273.351 was evaluated as a third dose. The ability of the multivalent  
283 mRNA-1273.211 vaccine to boost immunity against both the D614G and B.1.351 viruses has not  
284 yet been assessed in preclinical models, although a recent exploratory analysis among a subset of  
285 patients in a clinical trial showed a mRNA-1273.211 booster dose increased neutralization against  
286 D614G and several VOCs, including B.1.351 [42]. Finally, very little antibody waning was  
287 measured in the 7-month evaluation of antibody levels in mice prior to the delivery of the boosting  
288 dose. This level of durability may not be reflective of that measured in NHPs or humans [42,43].

289 The emergence of SARS-CoV-2 variants and the ability of the virus to partially overcome  
290 natural or vaccine-induced immunity served as a call to action. Not only are continued vaccination  
291 efforts needed to prevent the emergence of future VOCs, but strategies are needed for new SARS-  
292 CoV-2 vaccine research and development that can enhance the level of protection against key  
293 VOCs should they arise. The mRNA vaccine platform approach against SARS-CoV-2 VOCs has  
294 now been demonstrated in mice to be effective at broadening neutralization across variants and to  
295 boost antibody levels when applied as a third dose, with mitigation of the significant reduction in  
296 neutralization seen against the B.1.351 lineage. The mRNA platform allows for rapid design of  
297 vaccine antigens that incorporate key mutations, allowing for rapid future development of  
298 alternative variant-matched vaccines should they be needed. The designs evaluated in this study  
299 demonstrated potent cross-variant neutralization as a primary series and the ability to evolve the

300 immune response through boosting; additional VOC designs can be rapidly developed and  
301 deployed in the future if needed to address the evolving SARS-CoV-2 virus.

302

### 303 **Declaration of Competing Interests**

304 K.W., A.C., M.C., S.E., L.M., D.L., A.W., C.H., C.P., A.H., H.J., J.Q., N.N., S.F., E.N., T.C.,  
305 H.B., G.B.E.S.-J., A.C., and D.K.E. are employees of and shareholders in Moderna Inc.

306 S.O.C., A.B.M., K.S.C., R.S., and B.S.G. report no conflict of interest.

### 307 **Acknowledgements**

308 We thank Michael Brunner and Dr. Michael Whitt for kind support on recombinant VSV-based  
309 SARS-CoV-2 pseudovirus production. Medical writing and editorial assistance was provided by  
310 Jared Cochran, PhD, of MEDiSTRAVA in accordance with Good Publication Practice (GPP3)  
311 guidelines, funded by Moderna Inc, and under the direction of the authors.

### 312 **Contributors**

313 Conceptualization, K.W., S.E., S.R., E.N., G. S.-J., A.C., D.K.E.; data collection, K.W., A.C.,  
314 M.K., S.E., L.M., D.L., A.W., C.H., C.P., A.H., H.J., J.Q., N.N., S.O., A.M.; analysis/interpretation  
315 of data, K.W., A.C., M.K., A.W., C.H., C.P., D.K.E.; writing—original draft preparation, D.K.E.;  
316 reviewing and editing, all authors. All authors have read and agreed to the published version of the  
317 manuscript.

### 318 **Data Availability**

319 The authors declare that the data supporting the findings of this study are available within this  
320 article.



321 **Role of the Funding Source**

322 Employees of the study sponsor, Moderna, Inc., contributed to the study design, data collection,  
323 analysis and interpretation, and writing of the report.

324 **Funding**

325 This research was funded by Moderna Inc.

326

327 **References**

328

329 [1] Zhou P, Yang XL, Wang XG, Hu B, Zhang L, Zhang W, et al. A pneumonia outbreak  
330 associated with a new coronavirus of probable bat origin. *Nature*. 2020;579:270-3.

331 [2] Coronaviridae Study Group. The species Severe acute respiratory syndrome-related  
332 coronavirus: classifying 2019-nCoV and naming it SARS-CoV-2. *Nat Microbiol*. 2020;5:536-44.

333 [3] Wrapp D, Wang N, Corbett KS, Goldsmith JA, Hsieh CL, Abiona O, et al. Cryo-EM  
334 structure of the 2019-nCoV spike in the prefusion conformation. *Science*. 2020;367:1260-3.

335 [4] Jackson LA, Anderson EJ, Roupheal NG, Roberts PC, Makhene M, Coler RN, et al. An  
336 mRNA Vaccine against SARS-CoV-2 - Preliminary Report. *N Engl J Med*. 2020;383:1920-31.

337 [5] Baden LR, El Sahly HM, Essink B, Kotloff K, Frey S, Novak R, et al. Efficacy and Safety of  
338 the mRNA-1273 SARS-CoV-2 Vaccine. *N Engl J Med*. 2021;384:403-16.

339 [6] FDA (2021) COVID-19 Vaccines. Accessed April 13, 2021.

340 <https://www.fda.gov/media/144673/download>.

341 [7] Korber B, Fischer WM, Gnanakaran S, Yoon H, Theiler J, Abfalterer W, et al. Tracking  
342 Changes in SARS-CoV-2 Spike: Evidence that D614G Increases Infectivity of the COVID-19  
343 Virus. *Cell*. 2020;182:812-27 e19.

344 [8] Plante JA, Liu Y, Liu J, Xia H, Johnson BA, Lokugamage KG, et al. Spike mutation D614G  
345 alters SARS-CoV-2 fitness. *Nature*. 2021;592:116-21.

346 [9] Volz E, Hill V, McCrone JT, Price A, Jorgensen D, O'Toole A, et al. Evaluating the Effects  
347 of SARS-CoV-2 Spike Mutation D614G on Transmissibility and Pathogenicity. *Cell*.  
348 2021;184:64-75 e11.

349 [10] Yurkovetskiy L, Wang X, Pascal KE, Tomkins-Tinch C, Nyalile TP, Wang Y, et al.  
350 Structural and Functional Analysis of the D614G SARS-CoV-2 Spike Protein Variant. *Cell*.  
351 2020;183:739-51 e8.

352 [11] Walls AC, Park YJ, Tortorici MA, Wall A, McGuire AT, Veesler D. Structure, function,  
353 and antigenicity of the SARS-CoV-2 spike glycoprotein. *Cell*. 2020;181:281-92.e6.

- 354 [12] Letko M, Marzi A, Munster V. Functional assessment of cell entry and receptor usage for  
355 SARS-CoV-2 and other lineage B betacoronaviruses. *Nat Microbiol.* 2020;5:562-9.
- 356 [13] Wang Q, Zhang Y, Wu L, Niu S, Song C, Zhang Z, et al. Structural and Functional Basis of  
357 SARS-CoV-2 Entry by Using Human ACE2. *Cell.* 2020;181:894-904 e9.
- 358 [14] Shang J, Wan Y, Luo C, Ye G, Geng Q, Auerbach A, et al. Cell entry mechanisms of  
359 SARS-CoV-2. *Proc Natl Acad Sci U S A.* 2020;117:11727-34.
- 360 [15] Keech C, Albert G, Cho I, Robertson A, Reed P, Neal S, et al. Phase 1-2 Trial of a SARS-  
361 CoV-2 Recombinant Spike Protein Nanoparticle Vaccine. *N Engl J Med.* 2020;383:2320-32.
- 362 [16] Walsh EE, Frenck RW, Jr., Falsey AR, Kitchin N, Absalon J, Gurtman A, et al. Safety and  
363 Immunogenicity of Two RNA-Based Covid-19 Vaccine Candidates. *N Engl J Med.*  
364 2020;383:2439-50.
- 365 [17] Anderson EJ, Roupael NG, Widge AT, Jackson LA, Roberts PC, Makhene M, et al. Safety  
366 and Immunogenicity of SARS-CoV-2 mRNA-1273 Vaccine in Older Adults. *N Engl J Med.*  
367 2020;383:2427-38.
- 368 [18] McCallum M, De Marco A, Lempp FA, Tortorici MA, Pinto D, Walls AC, et al. N-terminal  
369 domain antigenic mapping reveals a site of vulnerability for SARS-CoV-2. *Cell.* 2021:S0092-  
370 8674(21)00356-1.
- 371 [19] Hoffmann M, Arora P, Gross R, Seidel A, Hornich BF, Hahn AS, et al. SARS-CoV-2  
372 variants B.1.351 and P.1 escape from neutralizing antibodies. *Cell.* 2021:S0092-8674(21)00367-  
373 6.
- 374 [20] Tada T, Dcosta BM, Zhou H, Vaill A, Kazmierski W, Landau NR. Decreased neutralization  
375 of SARS-CoV-2 global variants by therapeutic anti-spike protein monoclonal antibodies.  
376 *bioRxiv.* 2021;2021.02.18.431897.
- 377 [21] Greaney AJ, Loes AN, Crawford KHD, Starr TN, Malone KD, Chu HY, et al.  
378 Comprehensive mapping of mutations in the SARS-CoV-2 receptor-binding domain that affect  
379 recognition by polyclonal human plasma antibodies. *Cell Host Microbe.* 2021;29:463-76 e6.
- 380 [22] Wang P, Nair MS, Liu L, Iketani S, Luo Y, Guo Y, et al. Antibody resistance of SARS-  
381 CoV-2 variants B.1.351 and B.1.1.7. *Nature.* 2021.

- 382 [23] Zhou H, Dcosta BM, Samanovic MI, Mulligan MJ, Landau NR, Tada T. B.1.526 SARS-  
383 CoV-2 Variants Identified in New York City are Neutralized by Vaccine-Elicited and  
384 Therapeutic Monoclonal Antibodies. *mBio*. 2021;12:e0138621.
- 385 [24] Tada T, Dcosta BM, Samanovic MI, Herati RS, Cornelius A, Zhou H, et al. Convalescent-  
386 Phase Sera and Vaccine-Elicited Antibodies Largely Maintain Neutralizing Titer against Global  
387 SARS-CoV-2 Variant Spikes. *mBio*. 2021;12:e0069621.
- 388 [25] Deng X, Garcia-Knight MA, Khalid MM, Servellita V, Wang C, Morris MK, et al.  
389 Transmission, infectivity, and neutralization of a spike L452R SARS-CoV-2 variant. *Cell*.  
390 2021;184:3426-37 e8.
- 391 [26] Wu K, Werner AP, Koch M, Choi A, Narayanan E, Stewart-Jones GBE, et al. Serum  
392 Neutralizing Activity Elicited by mRNA-1273 Vaccine. *N Engl J Med*. 2021.
- 393 [27] Voysey M, Clemens SAC, Madhi SA, Weckx LY, Folegatti PM, Aley PK, et al. Safety and  
394 efficacy of the ChAdOx1 nCoV-19 vaccine (AZD1222) against SARS-CoV-2: an interim  
395 analysis of four randomised controlled trials in Brazil, South Africa, and the UK. *Lancet*.  
396 2021;397:99-111.
- 397 [28] Emary KRW, Golubchik T, Aley PK, Ariani CV, Angus B, Bibi S, et al. Efficacy of  
398 ChAdOx1 nCoV-19 (AZD1222) vaccine against SARS-CoV-2 variant of concern 202012/01  
399 (B.1.1.7): an exploratory analysis of a randomised controlled trial. *Lancet*. 2021;397:1351-62.
- 400 [29] Sadoff J, Gray G, Vandebosch A, Cardenas V, Shukarev G, Grinsztejn B, et al. Safety and  
401 Efficacy of Single-Dose Ad26.COV2.S Vaccine against Covid-19. *N Engl J Med*.  
402 2021;384:2187-201.
- 403 [30] Shinde V, Bhikha S, Hoosain Z, Archary M, Borat Q, Fairlie L, et al. Efficacy of NVX-  
404 CoV2373 Covid-19 Vaccine against the B.1.351 Variant. *N Engl J Med*. 2021;384:1899-909.
- 405 [31] Kustin T, Harel N, Finkel U, Perchik S, Harari S, Tahor M, et al. Evidence for increased  
406 breakthrough rates of SARS-CoV-2 variants of concern in BNT162b2-mRNA-vaccinated  
407 individuals. *Nat Med*. 2021;27:1379-84.
- 408 [32] Thomas SJ, Moreira ED, Jr., Kitchin N, Absalon J, Gurtman A, Lockhart S, et al. Safety and  
409 Efficacy of the BNT162b2 mRNA Covid-19 Vaccine through 6 Months. *N Engl J Med*. 2021.

- 410 [33] Choi A, Koch M, Wu K, Dixon G, Oestreicher J, Legault H, et al. Serum Neutralizing  
411 Activity of mRNA-1273 Against SARS-CoV-2 Variants. *J Virol*. 2021:JV10131321.
- 412 [34] Corbett KS, Werner AP, Connell SO, Gagne M, Lai L, Moliva JI, et al. mRNA-1273  
413 protects against SARS-CoV-2 beta infection in nonhuman primates. *Nat Immunol*. 2021.
- 414 [35] Nelson J, Sorensen EW, Mintri S, Rabideau AE, Zheng W, Besin G, et al. Impact of mRNA  
415 chemistry and manufacturing process on innate immune activation. *Sci Adv*. 2020;6:eaz6893.
- 416 [36] Hassett KJ, Benenato KE, Jacquinet E, Lee A, Woods A, Yuzhakov O, et al. Optimization  
417 of Lipid Nanoparticles for Intramuscular Administration of mRNA Vaccines. *Mol Ther Nucleic  
418 Acids*. 2019;15:1-11.
- 419 [37] Bahl K, Senn JJ, Yuzhakov O, Bulychev A, Brito LA, Hassett KJ, et al. Preclinical and  
420 Clinical Demonstration of Immunogenicity by mRNA Vaccines against H10N8 and H7N9  
421 Influenza Viruses. *Mol Ther*. 2017;25:1316-27.
- 422 [38] John S, Yuzhakov O, Woods A, Deterling J, Hassett K, Shaw CA, et al. Multi-antigenic  
423 human cytomegalovirus mRNA vaccines that elicit potent humoral and cell-mediated immunity.  
424 *Vaccine*. 2018;36:1689-99.
- 425 [39] Vogel AB, Lambert L, Kinnear E, Busse D, Erbar S, Reuter KC, et al. Self-Amplifying  
426 RNA Vaccines Give Equivalent Protection against Influenza to mRNA Vaccines but at Much  
427 Lower Doses. *Mol Ther*. 2018;26:446-55.
- 428 [40] Whitt MA. Generation of VSV pseudotypes using recombinant DeltaG-VSV for studies on  
429 virus entry, identification of entry inhibitors, and immune responses to vaccines. *J Virol  
430 Methods*. 2010;169:365-74.
- 431 [41] Corbett KS, Edwards DK, Leist SR, Abiona OM, Boyoglu-Barnum S, Gillespie RA, et al.  
432 SARS-CoV-2 mRNA vaccine design enabled by prototype pathogen preparedness. *Nature*.  
433 2020;586:567-71.
- 434 [42] Choi A, Koch M, Wu K, Chu L, Ma L, Hill A, et al. Safety and immunogenicity of SARS-  
435 CoV-2 variant mRNA vaccine boosters in healthy adults: an interim analysis. *Nat Med*. 2021.
- 436 [43] Francica JR, Zak DE, Linde C, Siena E, Johnson C, Juraska M, et al. Innate transcriptional  
437 effects by adjuvants on the magnitude, quality, and durability of HIV envelope responses in  
438 NHPs. *Blood Adv*. 2017;1:2329-42.

439 [44] Lan J, Ge J, Yu J, Shan S, Zhou H, Fan S, et al. Structure of the SARS-CoV-2 spike  
440 receptor-binding domain bound to the ACE2 receptor. *Nature*. 2020;581:215-20.  
441

442 **Tables**

443 **Table 1. S-protein substitutions in SARS-CoV-2 variants evaluated in this study.**

| <b>Variant Name</b>                             | <b>Amino Acid Changes in S Protein Relative to Wuhan-Hu-1</b>                        |
|-------------------------------------------------|--------------------------------------------------------------------------------------|
| D614G                                           | D614G                                                                                |
| B.1.351 (Beta)<br>(501Y.V2)                     | L18F, D80A, D215G, $\Delta$ 242-244, R246I, K417N, E484K,<br>N501Y, D614G, A701V     |
| P.1 (Gamma)<br>(501Y.V3)                        | L18F, T20N, P26S, D138Y, R190S, K417T, E484K, N501Y,<br>D614G, H655Y, T1027I, V1176F |
| B.1.427/B.1.429 (Epsilon)<br>(452R.V1, CAL.20C) | S13I, W152C, L452R, D614G                                                            |

444

445

446 **Figure Legends**

447 **Fig. 1. Model of S protein.** mRNA-1273.351 encodes the B.1.351 lineage S variant. Surface  
448 representation of the trimeric S protein in the vertical view with the locations of surface-exposed  
449 mutated residues highlighted in red spheres and labelled on the gray monomer. The inset shows  
450 superimposition of ACE2 receptor domain and the RBD. S protein structure, 6VSB [3]. ACE2-  
451 RBD structure, 6M0J [44].

452 ACE2 = angiotensin converting enzyme 2; NTD = N-terminal domain; RBD = receptor binding  
453 domain.

454

455 **Fig. 2. S protein-binding antibody and neutralization of variant SARS-CoV-2 pseudoviruses**  
456 **by serum from vaccinated BALB/c mice. a,** BALB/c mice were immunized on a two-dose  
457 schedule with 1 or 10  $\mu$ g mRNA-1273, mRNA-1273.351, mRNA-1273.211 (1:1 mix of mRNA-  
458 1273 and mRNA-1273.351), or PBS. **b,** Results from individual mouse sera (n = 10) following  
459 dose 1 (day 15) and after dose 2 (day 36) are represented as dots on each figure; the horizontal line  
460 indicates the GMT. **c,** BALB/c mice were immunized with 1  $\mu$ g mRNA-1273, mRNA-1273.351,  
461 mRNA-1273.211. Each bar indicates the GMT value after dose 2 (day 36), which is listed as text  
462 above each plot. **d,** GMT values from individual mouse sera (n = 8 per antigen [randomly selected])  
463 after dose 2 (day 36) of 1  $\mu$ g mRNA-1273, mRNA-1273.351, or mRNA-1273.211 are represented  
464 as dots on each figure, with lines connecting matched pairs for the D614G and B.1.351  
465 neutralization titers. Fold difference in neutralization against each virus was shown in text above  
466 each plot. Wilcoxon matched-pairs signed-rank test. Two-tailed p values: \* $<0.1$ ; \*\* $<0.01$ . **e,**  
467 BALB/c mice were immunized with 1  $\mu$ g mRNA-1273, mRNA-1273.351, or the multivalent  
468 mRNA-1273.211 vaccine (n = 8). Each bar indicates the GMT value after dose 2 (day 36), which



469 is listed as text above each plot. The horizontal dotted line indicates the lower limit of quantitation  
470 for NAb titer at 40 ID<sub>50</sub>.

471 ELISA = enzyme-linked immunosorbent assay; GMT = geometric mean titer; ID<sub>50</sub> = inhibitory  
472 dilution factor; IgG = immunoglobulin G; Nab = neutralizing antibody; ns, not significant; PBS =  
473 phosphate-buffered saline; PsVN = pseudovirus neutralization titer

474

475 **Fig. 3. S-protein binding antibody and neutralization of D614G and B.1.351 SARS-CoV-2**  
476 **pseudoviruses by serum from 1 µg mRNA-1273.351 boosted BALB/c mice. a,** BALB/c mice  
477 were immunized with 1 or 0.1 µg mRNA-1273 (dose 1 on day 1; dose 2 on day 22) and were  
478 boosted with 1 or 0.1 µg mRNA-1273.351 on day 213. **b,** Results from individual mouse sera (n  
479 = 5 per group) are represented as dots on each figure, and the line is the mean of each group. The  
480 horizontal dotted line indicates the lower limit of quantitation for log<sub>10</sub> IgG titer at 1.398. **c,**  
481 BALB/c mice previously immunized with mRNA-1273 were given a third dose with 1 µg mRNA-  
482 1273.351, with PsVN assessed against wild-type D614G and B.1.351 prior to dose 3 (Day 212)  
483 and 3 weeks after dose 3 (Day 233). Postdose 2 peak neutralization titer (Day 36) was referenced  
484 against D614G. **d,** Fold rise in neutralization against both viruses from the boosting dose of  
485 mRNA-1273.351. **e,** Fold difference in neutralization prior to and after dose 3. Postdose 2 peak  
486 neutralization titer reference (D614G assay). The box indicates the GMT, which is listed as text  
487 above each plot. The horizontal dotted line indicates the lower limit of quantitation for NAb titer  
488 at 40 ID<sub>50</sub>. Results from individual mouse sera is represented as dots on each figure, with lines  
489 connecting the D614G and B.1.351 neutralization titers.

490 ELISA = enzyme-linked immunosorbent assay; IgG = immunoglobulin G; PBS = phosphate-  
491 buffered saline; PsVN = pseudovirus neutralization; GMT = geometric mean titer; ID<sub>50</sub> = inhibitory  
492 dilution factor; NAb = neutralizing antibody.

493 **Figures**

494 **Figure 1**

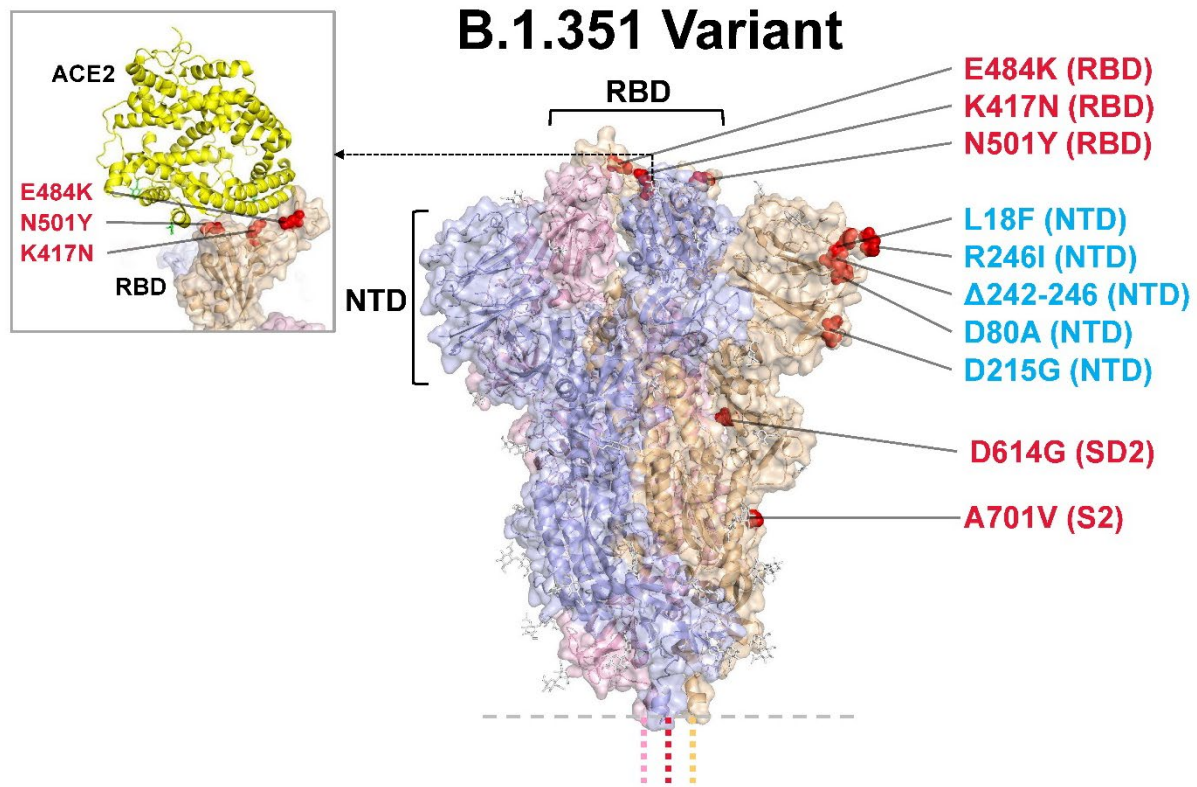

496

497 **Figure 2**

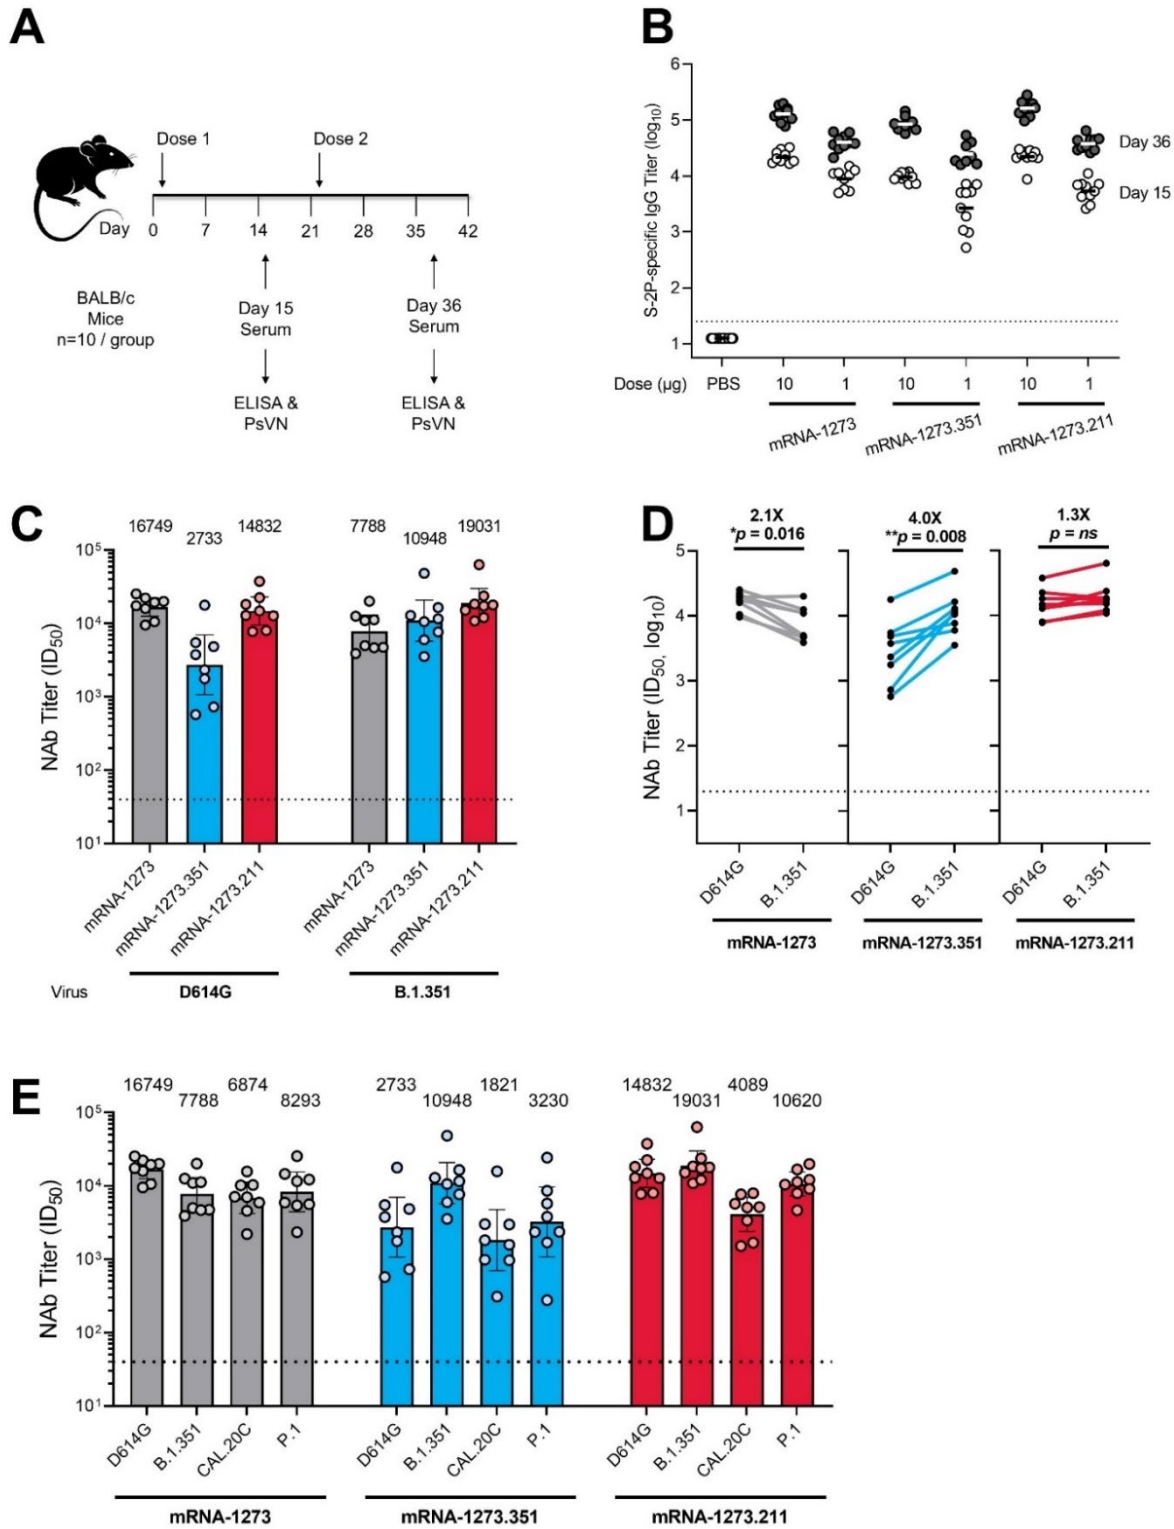

500 **Figure 3**

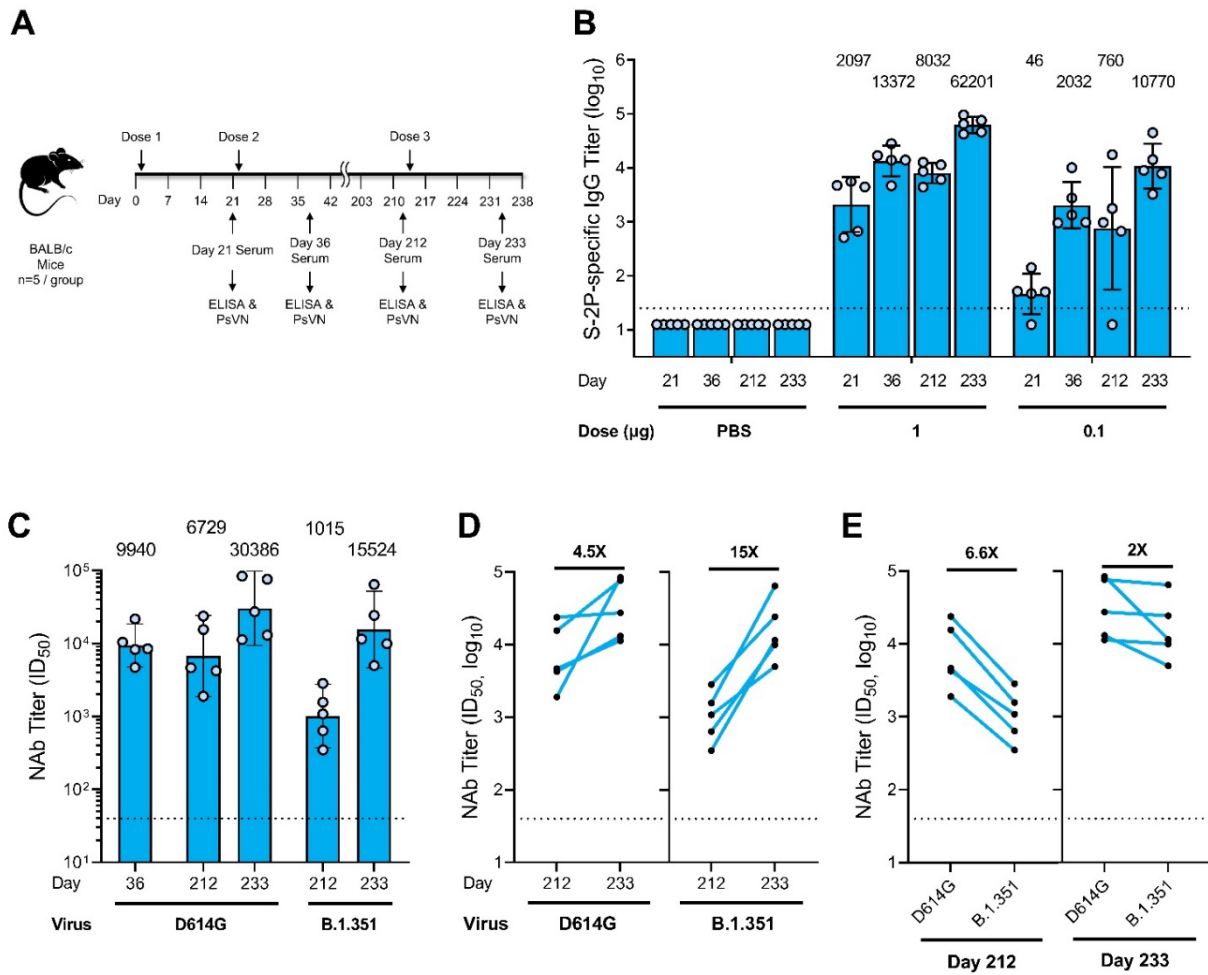

Source: http://biorxiv.org/content/10.1101/2021.04.13.439482v2.full.pdf
